# Supplementary material
Source: PubMed Central journal article supplement (PMC5104946)
Supplement: 10.1074_M116.743302_jbc.M116.743302-1.pdf [file 10.1074_M116.743302_jbc.M116.743302-1.pdf]

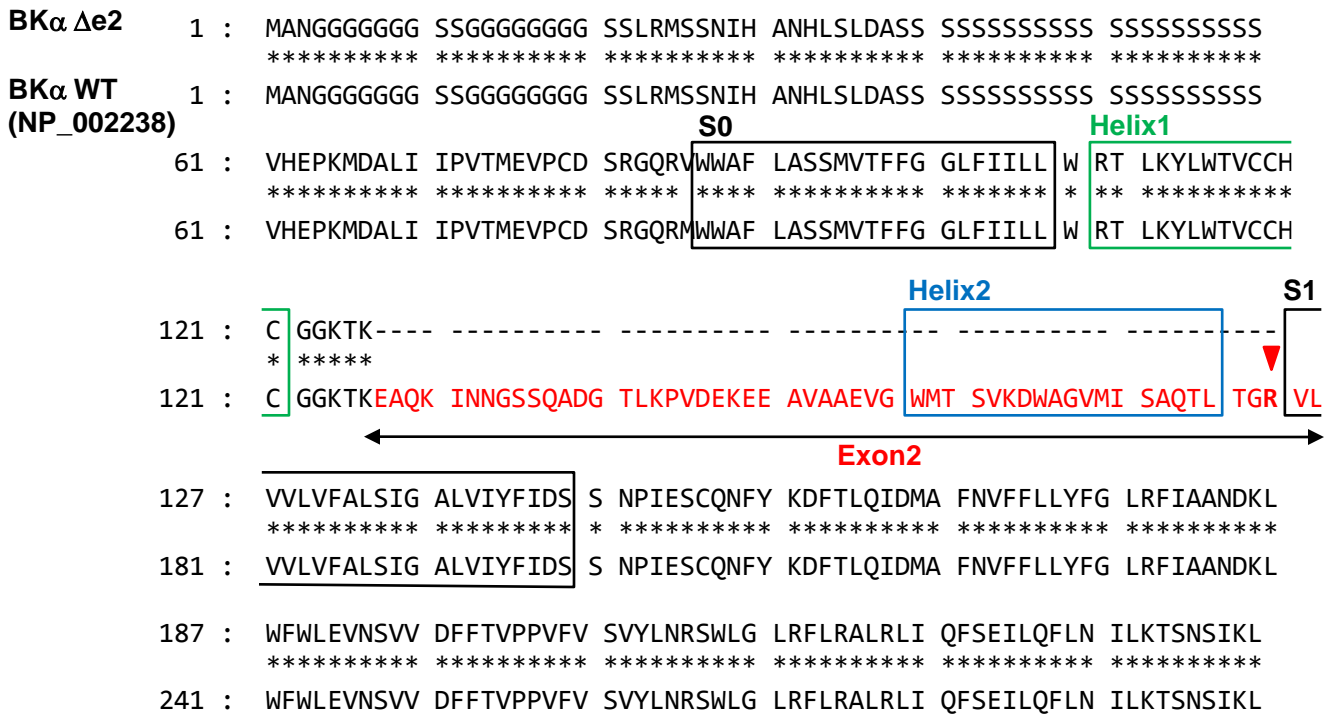

A

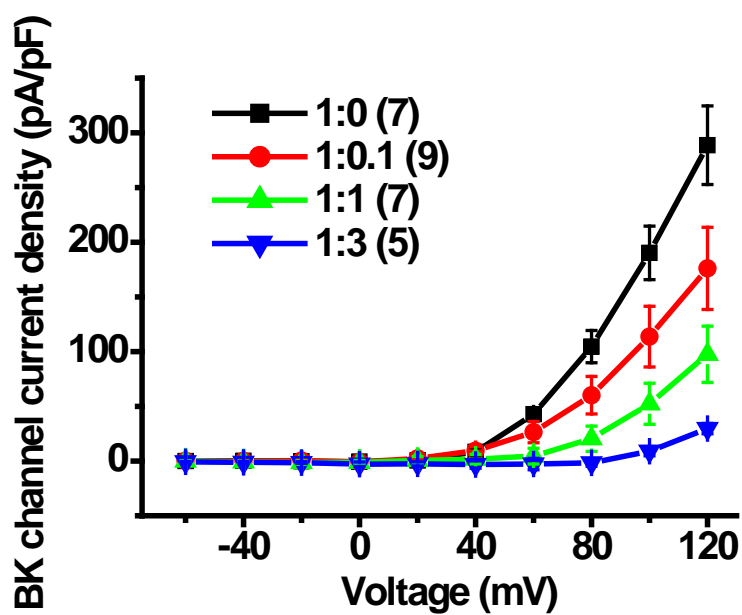

B

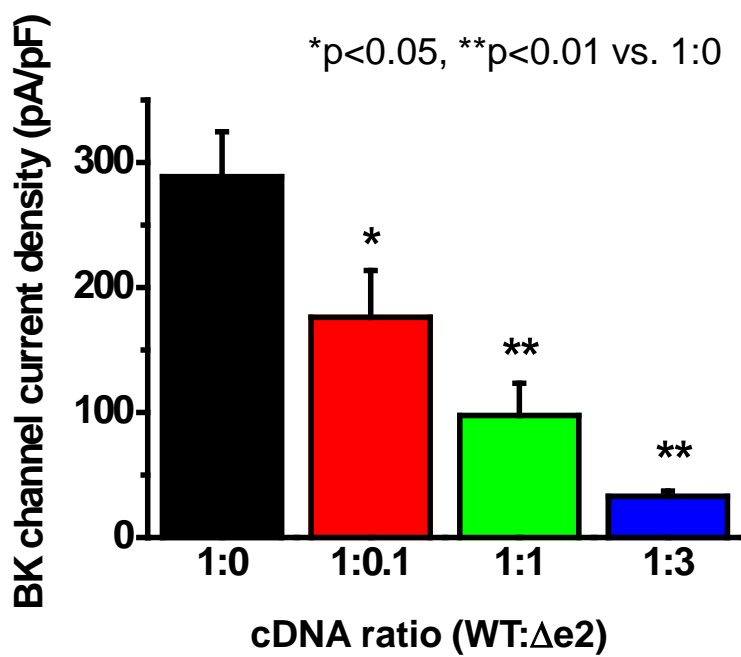

**A**

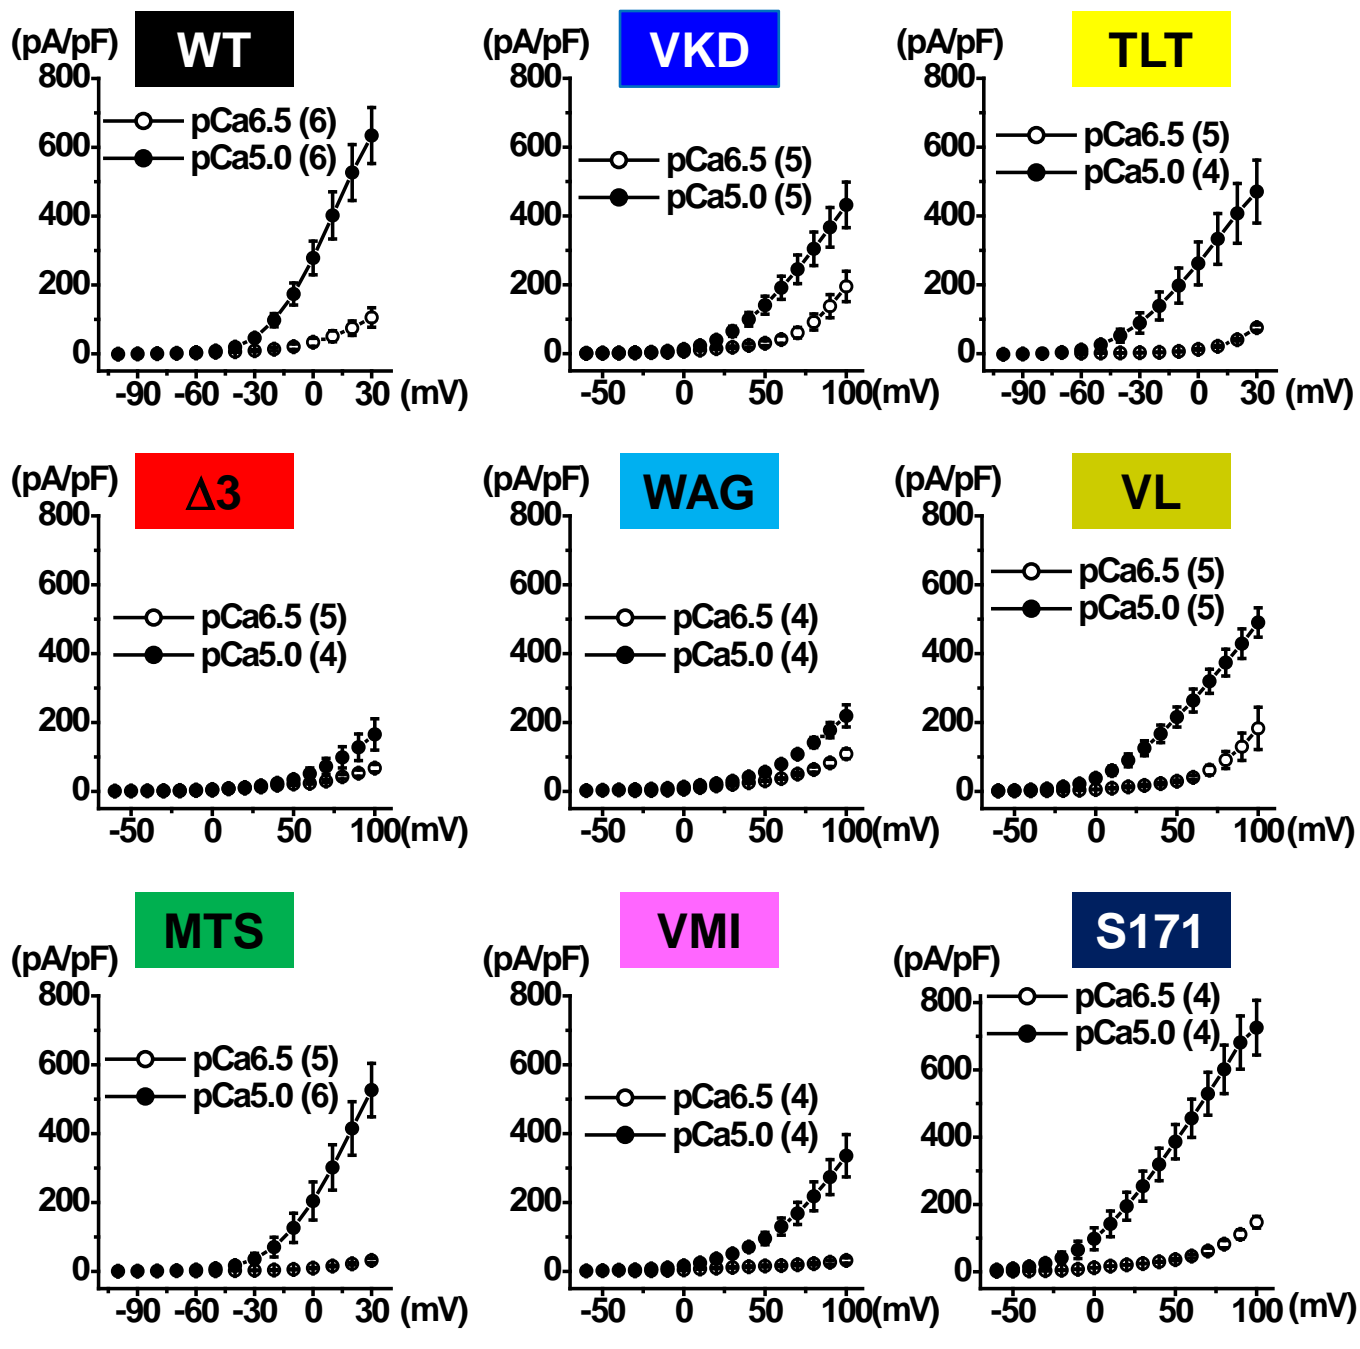

**B**

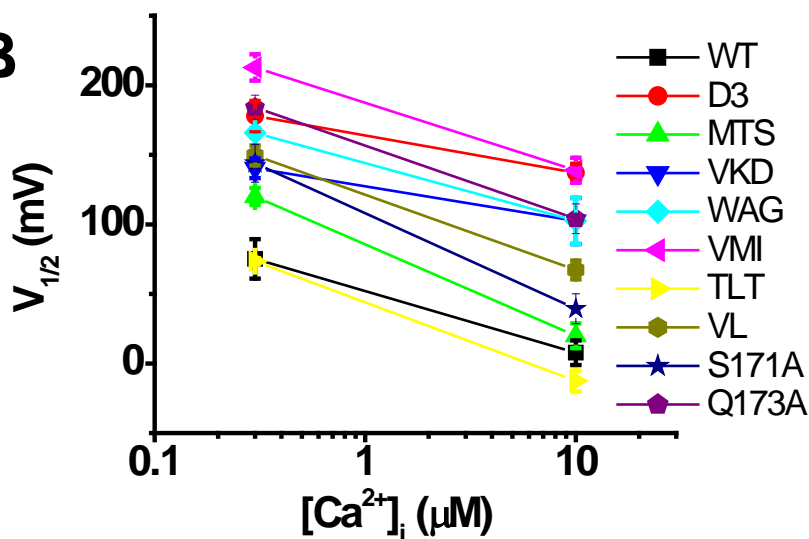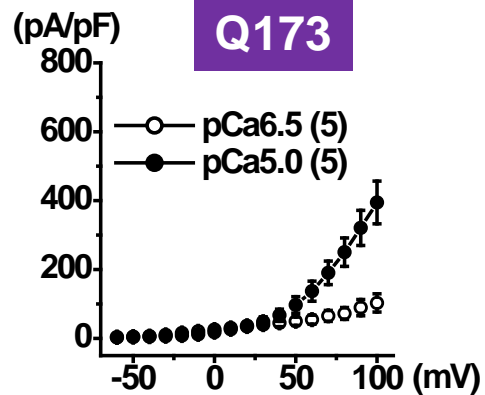

| For human BK $\alpha$ WT (NM_002247.3) (Q-PCR)                |                          |
|---------------------------------------------------------------|--------------------------|
| hBK $\alpha$ WT_s653                                          | TGACCTCCGTGAAGGACTGG     |
| hBK $\alpha$ WT_a795                                          | GCAGGATTCTATTGGGTTTGATG  |
| For human BK $\alpha$ $\Delta$ e2 (NM_001271518.1) (Q-PCR)    |                          |
| hBK $\alpha$ $\Delta$ e2_s542                                 | GGGGCAAGACGAAGGTTG       |
| hBK $\alpha$ $\Delta$ e2_a634                                 | GGCAGGATTCTATTGGGTTTG    |
| For human BK $\alpha$ WT and BK $\alpha$ $\Delta$ e2 (RT-PCR) |                          |
| hBK $\alpha$ _s479                                            | GCCTCTTCATCATCTTGCTCTG   |
| hBK $\alpha$ _a992                                            | CTCAAACCAAGCCAACCTTCTGT  |
| For mouse BK $\alpha$ WT (NM_001253369.1) (Q-PCR)             |                          |
| mBK $\alpha$ WT_s417                                          | TACCTGTGGACCGTTTGCTG     |
| mBK $\alpha$ WT_a540                                          | CTGCCACCACCTCCTCTTTT     |
| For mouse BK $\alpha$ $\Delta$ e2 (NM_001253374.1) (Q-PCR)    |                          |
| mBK $\alpha$ $\Delta$ e2_s445                                 | GGGGCAAGACGAAGGTTG       |
| mBK $\alpha$ $\Delta$ e2_a537                                 | GGCAGGATTCTATTGGGTTTG    |
| For mouse BK $\alpha$ WT and BK $\alpha$ $\Delta$ e2 (RT-PCR) |                          |
| mBK $\alpha$ _s264                                            | CACGAGCCCAAGATGGATG      |
| mBK $\alpha$ _a781                                            | ATAAACCGCAAGCCAAAGTAGAG  |
| For human COX2 (NM_000963.3) (Q-PCR)                          |                          |
| hCOX2_s84                                                     | GACGCCCTCAGACAGCAAAG     |
| hCOX2_a213                                                    | ATGGGTGGGAACAGCAAGG      |
| For human GAPDH (NM_001289746.1) (Q-PCR)                      |                          |
| hGAPDH_s670                                                   | GACAACCTTTGGTATCGTGGAAGG |
| hGAPDH_a802                                                   | AGGCAGGGATGATGTTCTGG     |
| For mouse GAPDH (NM_001289726.1) (Q-PCR)                      |                          |
| mGAPDH_s776                                                   | CATGGCCTTCCGTGTTCTCT     |
| mGAPDH_a879                                                   | CCTGCTTCACCACCTTCTTGA    |

**Table S2**

| Fig. 2F and G |    | Unitary currents at +50 mV (pA) |                  | Conductance (pS) |                  | Mean open time at +50 mV (ms) |                 | # of recordings |
|---------------|----|---------------------------------|------------------|------------------|------------------|-------------------------------|-----------------|-----------------|
| WT+WT         |    | 11.4±0.2                        |                  | 232.9±3.5        |                  | 10.3±1.4                      |                 | 8               |
| WT+Δe2        | #1 | 11.8±0.2                        |                  | 236.9±3.9        |                  | 11.7±2.3                      |                 | 11              |
|               | #2 | 9.5±0.2                         | **<br>##         | 194.7±3.4        | **<br>##         | 13.3±2.2                      |                 | 9               |
|               | #3 | 3.0±0.2                         | **<br>##<br>\$\$ | 56.6±3.4         | **<br>##<br>\$\$ | 4.1±0.5                       | *<br>##<br>\$\$ | 10              |

\*p<0.05, \*\*p<0.01 vs. WT+WT;  
 ##p<0.01 vs. WT+Δe2 #1,  
 \$\$p<0.01 vs. WT+Δe2 #2

| Fig. 3                        | Unitary currents at +50 mV (pA) |                              |                              |                               |
|-------------------------------|---------------------------------|------------------------------|------------------------------|-------------------------------|
| Predicted number of WT(Y359V) | 1                               | 2                            | 3                            | 4                             |
| WT(Y359V)+WT                  | 1.4±0.1<br>(n=4)                | 3.2±0.1<br>(n=10)            | 6.6±0.2<br>(n=5)             | 9.0±0.2<br>(n=6)              |
| WT(Y359V)+Δe2                 | Group 4:<br>Not detected        | Group 3:<br>2.9±0.2<br>(n=4) | Group 2:<br>6.7±0.2<br>(n=4) | Group 1:<br>8.9±0.1<br>(n=12) |

**Table S4**

|               | Mutants of BK $\alpha$ | I <sub>BK</sub> (pA/pF) |            | ratio of anti-FLAG positive cells |                   |
|---------------|------------------------|-------------------------|------------|-----------------------------------|-------------------|
|               |                        | Mean                    | # of cells | Mean                              | # of ROIs (cells) |
| <b>Fig.6B</b> | <b>WT</b>              | 179.1±50.9              | 6          | 0.82±0.06                         | 8 (142)           |
|               | <b>Δ127-141 (Δ1)</b>   | 175.2±26.7              | 4          | 0.90±0.05                         | 6 (65)            |
|               | <b>Δ142-150 (Δ2)</b>   | 201.2±42.1              | 3          | 0.73 ±0.06                        | 7 (68)            |
|               | <b>Δ151-161 (Δ3)</b>   | -0.5±8.7 **             | 5          | 0.50±0.07 **                      | 5 (39)            |
|               | <b>Δ162-170 (Δ4)</b>   | -8.9±3.8 **             | 8          | 0.13±0.06**                       | 5 (48)            |
|               | <b>Δ171-178 (Δ5)</b>   | -5.2±4.2 **             | 7          | 0.08 ±0.04**                      | 5 (39)            |
|               | <b>Δ179-180 (Δ6)</b>   | 2.7±6.5 **              | 9          | 0.08 ±0.01**                      | 5 (66)            |
| <b>Fig.6C</b> | <b>WT</b>              | 255.0±35.1              | 7          | 0.75±0.05                         | 10 (104)          |
|               | <b>MTS</b>             | 119.9±37.3              | 5          | 0.53±0.07                         | 5 (45)            |
|               | <b>VKD</b>             | 19.5±13.2 **            | 7          | 0.74 ±0.08                        | 8 (95)            |
|               | <b>WAG</b>             | 78.3±39.1               | 4          | 0.82 ±0.04                        | 8 (87)            |
|               | <b>VMI</b>             | -1.3±4.8 **             | 7          | 0.80 ±0.06                        | 8 (79)            |
|               | <b>SAQ</b>             | 0.3±0.9 **              | 5          | 0.06±0.04**                       | 6 (48)            |
|               | <b>TLT</b>             | 427.5± 105.8 *          | 8          | 0.83±0.09                         | 6 (31)            |
|               | <b>GR</b>              | -4.4±4.5 *              | 3          | 0.08±0.02**                       | 6 (65)            |
|               | <b>VL</b>              | 5.7±4.5 **              | 6          | 0.83 ±0.08                        | 5 (63)            |
| <b>Fig.6D</b> | <b>WT</b>              | 164.5±39.6              | 5          | 0.81±0.04                         | 6 (65)            |
|               | <b>S171</b>            | 20.1± 7.7 **            | 6          | 0.82 ±0.07                        | 5 (57)            |
|               | <b>Q173</b>            | -7.1±4.6 **             | 6          | 0.65 ±0.06                        | 5 (40)            |
|               | <b>G177</b>            | 58.4± 19.9 **           | 6          | 0.50 ±0.07**                      | 5 (44)            |
|               | <b>R178</b>            | 15.7±5.5 **             | 7          | 0.21±0.05 **                      | 5 (36)            |

\*p&lt;0.05, \*\*p&lt;0.01 vs. WT

|                             | $V_{1/2}$ (mV) of BK $\alpha$ mutants                                      |                                                                         |                                       |
|-----------------------------|----------------------------------------------------------------------------|-------------------------------------------------------------------------|---------------------------------------|
|                             | [Ca <sup>2+</sup> ] <sub>i</sub> = 300 nM<br>(pCa 6.5)<br>(Fig. 6E and 6F) | [Ca <sup>2+</sup> ] <sub>i</sub> = 10 $\mu$ M<br>(pCa 5.0)<br>(Fig. S3) | $\Delta V_{1/2}$<br>(pCa5.0 – pCa6.5) |
| <b>WT</b>                   | 75.1 $\pm$ 14.2 (6)                                                        | 7.7 $\pm$ 8.9 (6) **                                                    | -67.4                                 |
| <b><math>\Delta</math>3</b> | 177.9 $\pm$ 10.8 (5)                                                       | 137.1 $\pm$ 6.5 (4) *                                                   | -40.8                                 |
| <b>MTS</b>                  | 120.0 $\pm$ 6.1 (5)                                                        | 20.0 $\pm$ 8.9 (6) **                                                   | -100.0                                |
| <b>VKD</b>                  | 140.3 $\pm$ 7.0 (5)                                                        | 102.0 $\pm$ 9.3 (5) *                                                   | -38.3                                 |
| <b>WAG</b>                  | 165.8 $\pm$ 3.6 (4)                                                        | 102.4 $\pm$ 16.6 (4) *                                                  | -63.4                                 |
| <b>VMI</b>                  | 212.8 $\pm$ 9.5 (4)                                                        | 138.9 $\pm$ 9.0 (4) **                                                  | -73.9                                 |
| <b>TLT</b>                  | 73.5 $\pm$ 2.2 (5)                                                         | -12.6 $\pm$ 7.5 (4) **                                                  | -86.1                                 |
| <b>VL</b>                   | 149.5 $\pm$ 7.2 (5)                                                        | 67.3 $\pm$ 6.8 (5) **                                                   | -82.2                                 |
| <b>S171</b>                 | 143.9 $\pm$ 13.6 (4)                                                       | 39.4 $\pm$ 10.8 (4) **                                                  | -104.6                                |
| <b>Q173</b>                 | 184.1 $\pm$ 8.7 (5)                                                        | 104.1 $\pm$ 10.7 (5) **                                                 | -80.0                                 |

\*p<0.05, \*\*p<0.01 vs. pCa6.5
